# Supplementary material
Source: PubMed Central journal article supplement (PMC4136474)

Type of file: figure

Label: suppl a

Filename: Supplemental Figure A.pdf

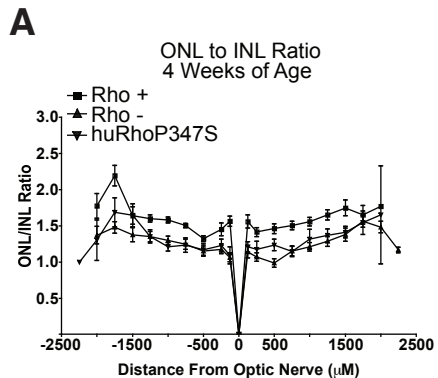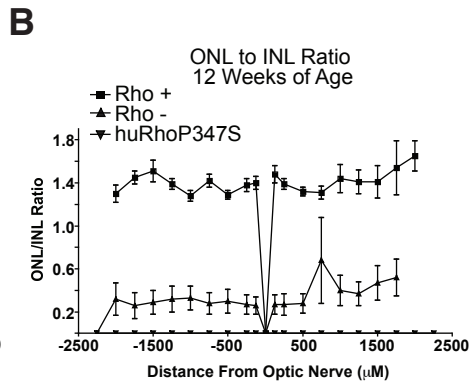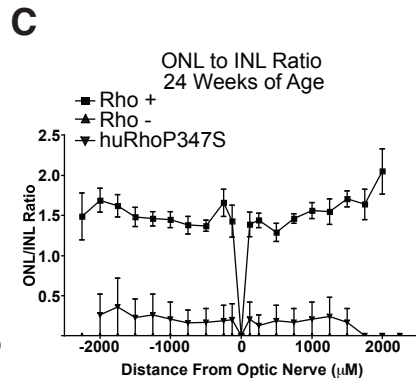

Type of file: figure

Label: suppl b

Filename: Supplemental Figure B.pdf

**A**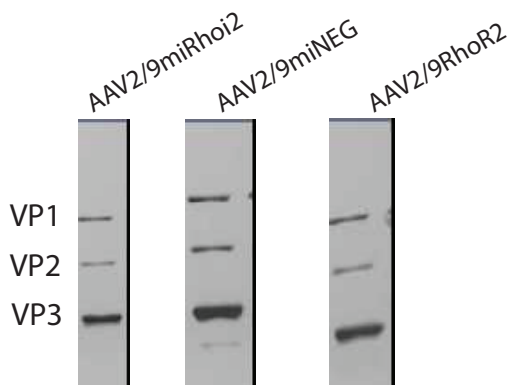**B**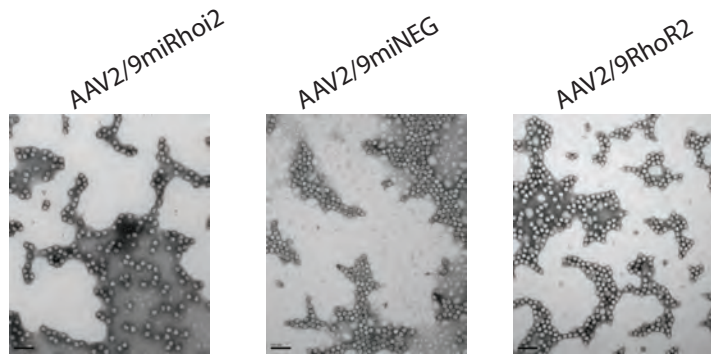

Supplement: NIHMS559852-supplement-supplement_1.pdf [file NIHMS559852-supplement-supplement_1.pdf]
